# Supplementary material for: Discovery and Characterization of a Novel Umbravirus from Paederia scandens Plants Showing Leaf Chlorosis and Yellowing Symptoms
Source: MDPI journal article supplement (doi:10.3390/v14081821), 2022-08-19
Supplement: s1 [file s1]

Table S1. Primers used in this study.

| Primer            | Sequence 5' > 3'                           |
|-------------------|--------------------------------------------|
| PSCYV-detection-F | CCAATGTTCAACTAGGTGGG                       |
| PSCYV-detection-R | ACTCTCTGCCGCTAATGTAT                       |
| PSCYV-5RACEGSP1-R | GTTGGCTGGAACACATCGAGGTGGCCA                |
| PSCYV-5RACEGSP2-R | GGGATGCTTCGTCGGGCTTTGGTGAAGC               |
| PSCYV-3RACEGSP1-F | ACTGAAACCCCAAGCCGGAGGAACTGTT               |
| PSCYV-3RACEGSP2-F | TCTTGCTGGTGTGGACTACCAGTGACCC               |
| PSCYV-F           | CGGGTATCGAAACCCGATT                        |
| PSCYV-R           | CGGGCGCGGTTGCAGTGATA                       |
| PSCYV-P1-2-F1     | ATGGCGAGCGTTCTTGCCA                        |
| PSCYV-P1-2-R1     | TCAAAAAATCCTTGCCCCGCCCCAA                  |
| PSCYV-P1-2-F2     | CCAAGGATTTTGTATTGGGGACGTCGT                |
| PSCYV-P1-2-R2     | CTAGCACACACGCCACAAC                        |
| PSCYV-P1-GFP-F    | GAGCTCGGTACCCGGGGATCCATGGCGAGCGTTCTTGCCAA  |
| PSCYV-P1-GFP-R    | CATGTCGACTCTAGAGGATCCAAAATCCTTGCCCCGGCCC   |
| PSCYV-P2-GFP-F    | GAGCTCGGTACCCGGGGATCCATGTTGTACAAGATGCTGGG  |
| PSCYV-P2-GFP-R    | CATGTCGACTCTAGAGGATCCGCACACACGCCACAACCTCGC |
| PSCYV-P3-GFP-F    | GAGCTCGGTACCCGGGGATCCATGGCCAGCGTTATCAATGT  |
| PSCYV-P3-GFP-R    | CATGTCGACTCTAGAGGATCCCCATTGTTGGCAGTAATGC   |
| PSCYV-P4-GFP-F    | GAGCTCGGTACCCGGGGATCCATGTCTACCACACTCTCCAG  |
| PSCYV-P4-GFP-R    | CATGTCGACTCTAGAGGATCCGTAGCGTGGTCGTGATGGAC  |
| PSCYV-P1-2-GFP-F  | GAGCTCGGTACCCGGGGATCCATGGCGAGCGTTCTTGCCAA  |
| PSCYV-P1-2-GFP-R  | CATGTCGACTCTAGAGGATCCGCACACACGCCACAACCTCGC |
| PSCYV-P1-Flag-F   | GAGCTCGGTACCCGGGGATCCATGGCGAGCGTTCTTGCCA   |
| PSCYV-P1-Flag-R   | GTCGTCGACTCTAGAGGATCCAAAATCCTTGCCCCGGCC    |
| PSCYV-P2-Flag-F   | GAGCTCGGTACCCGGGGATCCATGTTGTACAAGATGCTGGG  |
| PSCYV-P2-Flag-R   | GTCGTCGACTCTAGAGGATCCGCACACACGCCACAACCTCG  |
| PSCYV-P3-Flag -F  | GAGCTCGGTACCCGGGGATCCATGGCCAGCGTTATCAATGT  |
| PSCYV-P3-Flag-R   | GTCGTCGACTCTAGAGGATCCCCATTGTTGGCAGTAATGC   |
| PSCYV-P4-Flag -F  | GAGCTCGGTACCCGGGGATCCATGTCTACCACACTCTCCAG  |
| PSCYV-P4-Flag-R   | GTCGTCGACTCTAGAGGATCCGTAGCGTGGTCGTGATGGAC  |
| PSCYV-P1-2-Flag-F | GAGCTCGGTACCCGGGGATCCATGGCGAGCGTTCTTGCCA   |
| PSCYV-P1-2-Flag-R | GTCGTCGACTCTAGAGGATCCGCACACACGCCACAACCTCG  |
| PSCYV-PVX-P1-F    | TCAGCACCAGCTAGCATCGATATGGCGAGCGTTCTTGCCA   |
| PSCYV-PVX-P1-R    | AACCGTTCATCGGCGGTCTGACTCAAAAATCCTTGCCCCGG  |
| PSCYV-PVX-P2-F    | AGCTAGCATCGATTGGCGCGCCATGTTGTACAAGATGCTGGG |
| PSCYV-PVX-P2-R    | AACCGTTCATCGGCGGTCTGACTAGCACACACGCCACAAC   |
| PSCYV-PVX-P3-F    | AGCTAGCATCGATTGGCGCGCCATGGCCAGCGTTATCAATG  |
| PSCYV-PVX-P3-R    | AACCGTTCATCGGCGGTCTGACTCACCATTGTTGGCAGTAAT |
| PSCYV-PVX-P4-F    | TCAGCACCAGCTAGCATCGATATGTCTACCACACTCTCCAG  |
| PSCYV-PVX-P4-R    | AACCGTTCATCGGCGGTCTGACTTAGTAGCGTGGTCGTGATG |
| PSCYV-PVX-P1-2-F  | TCAGCACCAGCTAGCATCGATATGGCGAGCGTTCTTGCCA   |

|                  |                                             |
|------------------|---------------------------------------------|
| PSCYV-PVX-P1-2-R | AACCGTTCATCGGCGGTGACCTAGCACACACGCCACAAC     |
| PSCYV-pGD-P1-F   | TACAAATCTATCTCTGGATCCATGGCGAGCGTTCTTGCCA    |
| PSCYV-pGD-P1-R   | GTTTGAACGAGCTCTGTGCGACTCAAAAATCCTTGGCCCCG   |
| PSCYV-pGD-P2-F   | TACAAATCTATCTCTGGATCCATGTTGTACAAGATGCTGGG   |
| PSCYV-pGD-P2-R   | GTTTGAACGAGCTCTGTGCGACTAGCACACACGCCACAAC    |
| PSCYV-pGD-P3-F   | TACAAATCTATCTCTGGATCCATGGCCAGCGTTATCAATGT   |
| PSCYV-pGD-P3-R   | GTTTGAACGAGCTCTGTGCGACTCACCATTGTTGGCAGTAATG |
| PSCYV-pGD-P4-F   | TACAAATCTATCTCTGGATCCATGTCTACCACACTCTCCAG   |
| PSCYV-pGD-P4-R   | GTTTGAACGAGCTCTGTGCGACTTAGTAGCGTGGTCGTGATG  |
| PSCYV-pGD-P1-2-F | TACAAATCTATCTCTGGATCCATGGCGAGCGTTCTTGCCAA   |
| PSCYV-pGD-P1-2-R | GTTTGAACGAGCTCTGTGCGACTAGCACACACGCCACAAC    |
| pCB301-PSCYV-F   | AGTTCATTTTCAATTGGAGAGGCGGGTATCGAAACCCCGATT  |
| pCB301-PSCYV-R   | GTGGAGATGCCATGCCGACCCGGGCGCGGTTGCAGTGATAA   |

Table S2. Viruses of the genus *Umbravirus* used for the nucleotide and amino acid identity analyses.

| Virus name                        | Nucleotide identities |                |      | Amino acids identities |                |                |
|-----------------------------------|-----------------------|----------------|------|------------------------|----------------|----------------|
|                                   | Genome                | P1             | P2   | RdRp                   | P3             | P4             |
| Carrot mottle mimic virus         | NC_001726.1           | NP_054006.3    | None | NP_054007.4            | NP_054008.1    | NP_054009.1    |
| Carrot mottle virus               | NC_011515.1           | YP_009336474.1 | None | YP_002302259.2         | YP_002302260.1 | YP_002302261.1 |
| Ethiopian tobacco bushy top virus | NC_024808.1           | YP_009336475.1 | None | YP_009056849.1         | YP_009056850.1 | YP_009056851.1 |
| Groundnut rosette virus           | NC_003603.1           | NP_619659.1    | None | YP_009162058.1         | NP_619660.1    | NP_619661.1    |
| Ixeridium yellow mottle virus 2   | NC_034243.1           | YP_009352230.1 | None | YP_009352229.1         | YP_009352231.1 | YP_009352232.1 |
| Opium poppy mosaic virus          | NC_027710.2           | YP_009164949.1 | None | YP_009162614.2         | YP_009162615.1 | YP_009162616.1 |
| Patrinia mild mottle virus        | NC_055564.1           | YP_010087618.1 | None | YP_010087617.1         | YP_010087619.1 | YP_010087620.1 |
| Pea enation mosaic virus 2        | NC_003853.1           | NP_620845.1    | None | NP_620846.3            | NP_620847.1    | NP_620848.1    |
| Tobacco bushy top virus           | NC_004366.1           | NP_733847.1    | None | NP_733848.2            | NP_733849.1    | NP_733850.1    |
| Tobacco mottle virus              | NC_043206.1           | None           | None | YP_009665185.1         | YP_009665186.1 | YP_009665187.1 |

Table S3. Viruses used for phylogenetic analysis.

| Virus name                               | RdRp Accession number | Genus                  |
|------------------------------------------|-----------------------|------------------------|
| Carrot mottle mimic virus                | NP_054007.4           | <i>Umbravirus</i>      |
| Carrot mottle virus                      | YP_002302259.2        | <i>Umbravirus</i>      |
| Ethiopian tobacco bushy top virus        | YP_009056849.1        | <i>Umbravirus</i>      |
| Groundnut rosette virus                  | YP_009162058.1        | <i>Umbravirus</i>      |
| Ixeridium yellow mottle virus 2          | YP_009352229.1        | <i>Umbravirus</i>      |
| Opium poppy mosaic virus                 | YP_009162614.2        | <i>Umbravirus</i>      |
| Patrinia mild mottle virus               | YP_010087617.1        | <i>Umbravirus</i>      |
| Pea enation mosaic virus 2               | NP_620846.3           | <i>Umbravirus</i>      |
| Tobacco bushy top virus                  | NP_733848.2           | <i>Umbravirus</i>      |
| Tobacco mottle virus                     | YP_009665185.1        | <i>Umbravirus</i>      |
| Angelonia flower break virus             | YP_459960.2           | <i>Alphacarmovirus</i> |
| Carnation mottle virus                   | YP_009032645.1        | <i>Alphacarmovirus</i> |
| Tobacco necrosis virus A                 | NP_056825.2           | <i>Alphanecrovirus</i> |
| Olive mild mosaic virus                  | YP_224015.1           | <i>Alphanecrovirus</i> |
| Pothos latent virus                      | YP_009032634.1        | <i>Aureusvirus</i>     |
| Cucumber leaf spot virus                 | YP_009032639.1        | <i>Aureusvirus</i>     |
| Oat chlorotic stunt virus                | NP_619751.1           | <i>Avenavirus</i>      |
| Turnip crinkle virus                     | NP_620720.3           | <i>Betacarmovirus</i>  |
| Cardamine chlorotic fleck virus          | NP_041884.1           | <i>Betacarmovirus</i>  |
| Tobacco necrosis virus D                 | NP_608311.1           | <i>Betanecrovirus</i>  |
| Beet black scorch virus                  | NP_758810.3           | <i>Betanecrovirus</i>  |
| Galinsoga mosaic virus                   | NP_044732.1           | <i>Gallantivirus</i>   |
| Melon necrotic spot virus                | NP_041226.1           | <i>Gammacarmovirus</i> |
| Pea stem necrosis virus                  | NP_862835.2           | <i>Gammacarmovirus</i> |
| Furcraea necrotic streak virus           | YP_007517174.1        | <i>Macanavirus</i>     |
| Maize chlorotic mottle virus             | NP_619718.1           | <i>Machlomovirus</i>   |
| Panicum mosaic virus                     | NP_068342.1           | <i>Panicovirus</i>     |
| Thin paspalum asymptomatic virus         | YP_008219057.1        | <i>Panicovirus</i>     |
| Pelargonium ringspot virus               | YP_009116639.1        | <i>Pelarspovirus</i>   |
| Pelargonium chlorotic ring pattern virus | YP_052925.1           | <i>Pelarspovirus</i>   |
| Cucumber necrosis virus                  | NP_040953.2           | <i>Tombusvirus</i>     |
| Tomato bushy stunt virus                 | NP_062897.1           | <i>Tombusvirus</i>     |
| Maize necrotic streak virus              | YP_459920.2           | <i>Zeavirus</i>        |
| Carnation ringspot virus                 | NP_619711.1           | <i>Dianthovirus</i>    |
| Sweet clover necrotic mosaic virus       | NP_620674.3           | <i>Dianthovirus</i>    |
| Barley yellow dwarf virus-MAV            | NP_620064.1           | <i>Luteovirus</i>      |
| Barley yellow dwarf virus-PAS            | NP_037635.1           | <i>Luteovirus</i>      |
| Barley yellow dwarf virus-PAV            | NP_840014.2           | <i>Luteovirus</i>      |
| Pea enation mosaic virus 1               | NP_620026.3           | <i>Enamovirus</i>      |
| Potato leafroll virus                    | NP_056748.3           | <i>Polerovirus</i>     |

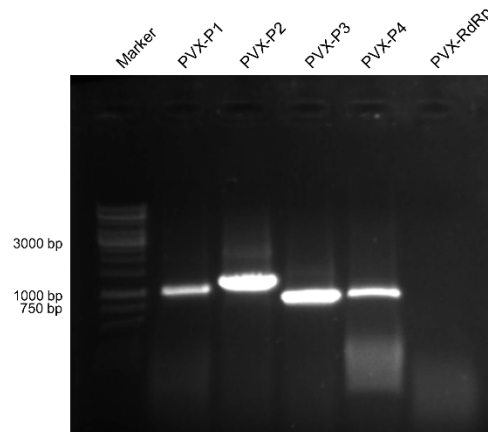

Figure S1. RT-PCR detecting PSCYV *P1*, *P2*, *P3*, *P4* and *RdRp* genes in the PVX-P1-, PVX-P2-, PVX-P3-, PVX-P4- and PVX-RdRp-infected plants at 21 dpi.
